# Supplementary material for: Platinum nanopetal-based potassium sensors for acute cell death monitoring
Source: Royal Society of Chemistry journal article supplement (doi:10.1039/c6ra01664b), 2016-01-01
Supplement: c6ra01664b1.pdf [file c6ra01664b1.pdf]

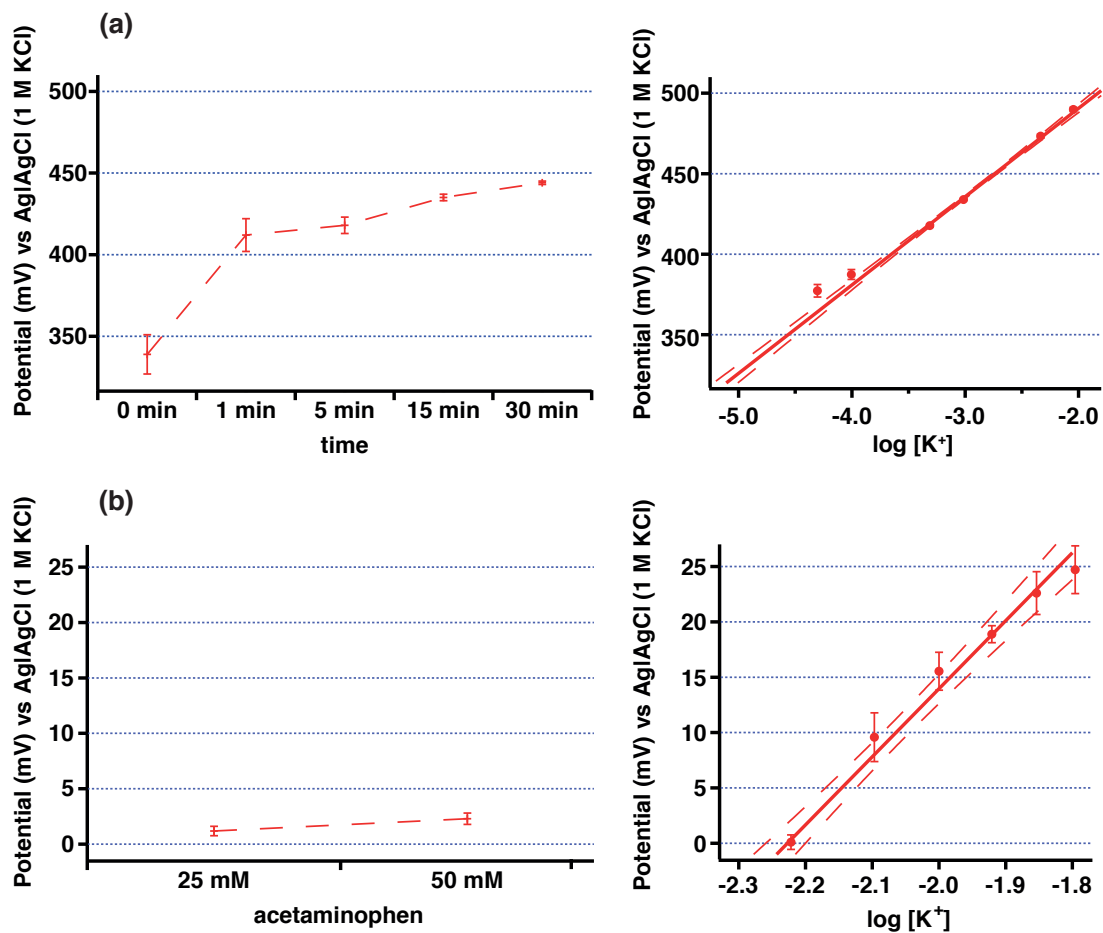

S1. Sensor signal increased after 1, 5, 15, 30 min of DI water exposure of cells and calibration curve (a). Sensor response to 36 h treatment with APAP at 25, 50 mM and calibration curve (b).
